# Supplementary material for: Molecular Characterization of the Tumor Suppressor Candidate 5 Gene: Regulation by PPARγ and Identification of TUSC5 Coding Variants in Lean and Obese Humans
Source: Hindawi journal article supplement (doi:10.1155/2009/867678), 2009-01-01
Supplement: f1 [file 867678.f1.pdf]

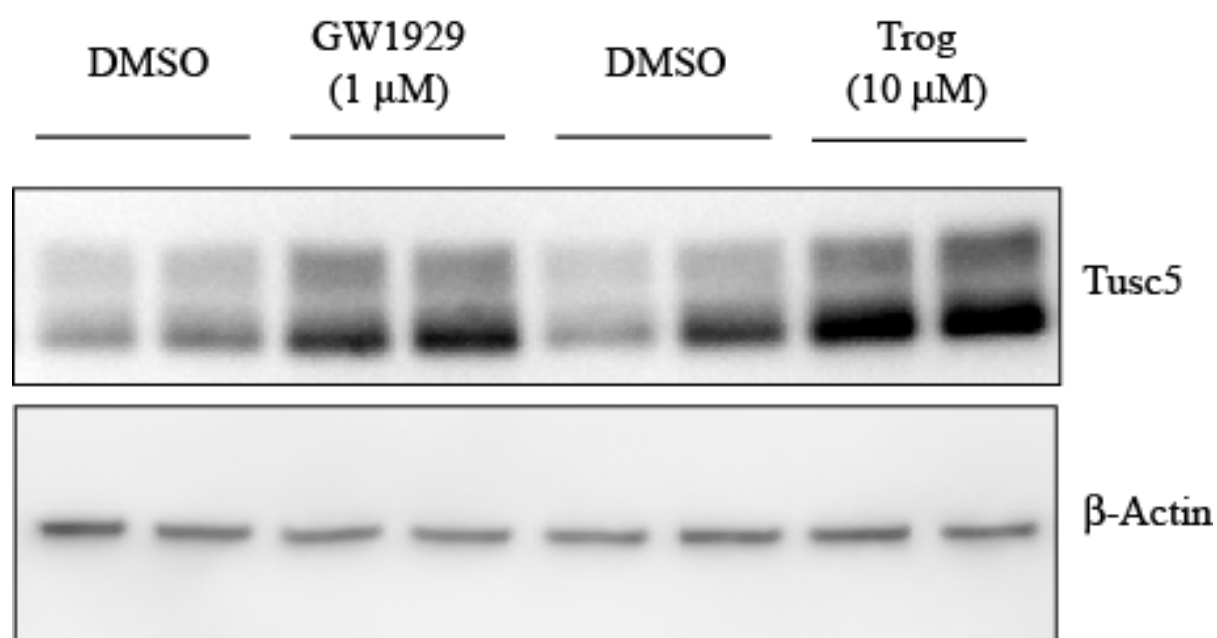

Placebo

PIO

Pre Post Pre Post Pre Post Pre Post Pre Post Pre Post

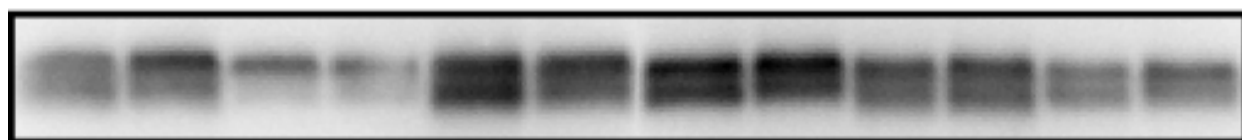

Tusc5

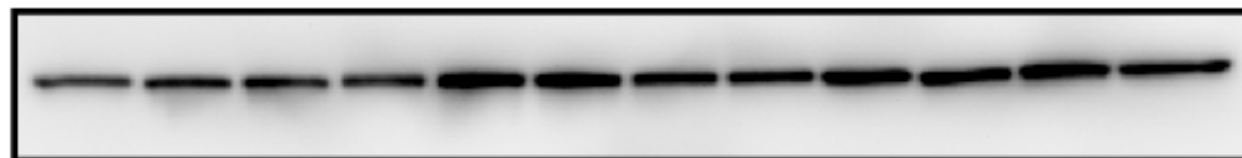

$\beta$ -actin
